# Supplementary material for: Effect comparison of inulin with different molecular weights ameliorating intracerebral neuroinflammation induced by advanced glycation end products (AGEs) in diabetic mice
Source: Royal Society of Chemistry journal article supplement (doi:10.1039/d5fo00867k), 2025-01-01
Supplement: d5fo00867k1.pdf [file d5fo00867k1.pdf]

**Effect comparison of inulin with different molecular weight ameliorates intracerebral neuroinflammation induced by advanced glycation end products (AGEs) in the diabetic mice**

Yanqi Li †, Aizhen Zong†, Cuiju Xu, Lina Liu, Yashi Zhang, Baorui Li, Fangling Du\*, Tongcheng Xu\*

Institute of Food & Nutrition Science and Technology, Shandong Academy of Agricultural Sciences/ Key Laboratory of Agro-Products Processing Technology of Shandong Province/ Key Laboratory of Novel Food Resources Processing, Ministry of Agriculture and Rural Affairs/ Shandong Engineering Research Center of Food for Special Medical Purpose, Jinan, PR China

† **These authors contributed equally to this study.**

**\*Corresponding author:**

Tongcheng Xu, E-mail: xtc@live.com

Fangling Du, E-mail: fsmf@126.vip.com

**Funding sources**

This study is financially supported by the National Key R&D Program of China (No. 2023YFF1104303), Agriculture Scientific and Technological Innovation Program of Shandong Academy of Agriculture Sciences (CXGC2024F09), Tai Mountain Industry Leading Talent of Shan Dong for Fangling Du (No. tscx.202408121).

**Disclosure statement**

The authors declare no competing financial interest.

## 22 SUPPLEMENTARY INFORMATION

23 **Table. S1 Compositions of animals' experimental diet**

| <b>Compositions<br/>(g.kg<sup>-1</sup>)</b> | <b>N<br/>LFSD<br/>(#D12328)</b> | <b>Mod<br/>HFSD<br/>(#D12331)</b> | <b>L/ M/ H/ SH<br/>HFSD<br/>(#D12331)</b> |
|---------------------------------------------|---------------------------------|-----------------------------------|-------------------------------------------|
| <b>Casein</b>                               | 200                             | 200                               | 200                                       |
| <b>Cornstarch</b>                           | 650                             | 250                               | 200                                       |
| <b>Sucrose</b>                              | --                              | 200                               | 200                                       |
| <b>Corn oil</b>                             | 50                              | 50                                | 50                                        |
| <b>Lard</b>                                 | --                              | 200                               | 200                                       |
| <b>Mineral mix</b>                          | 35                              | 35                                | 35                                        |
| <b>Vitamin mix</b>                          | 10                              | 10                                | 10                                        |
| <b>Cellulose</b>                            | 50                              | 50                                | 50                                        |
| <b>Choline</b>                              | 3                               | 3                                 | 3                                         |
| <b>Bitartrate</b>                           |                                 |                                   |                                           |
| <b>DL-methionine</b>                        | 2                               | 2                                 | 2                                         |
| <b>Inulin</b>                               | --                              | --                                | 50                                        |

24

25

26

27
